# Supplementary material
Source: MDPI journal article supplement (https://www.mdpi.com/2073-4441/14/11/1825)
Supplement: s1 [file s1]

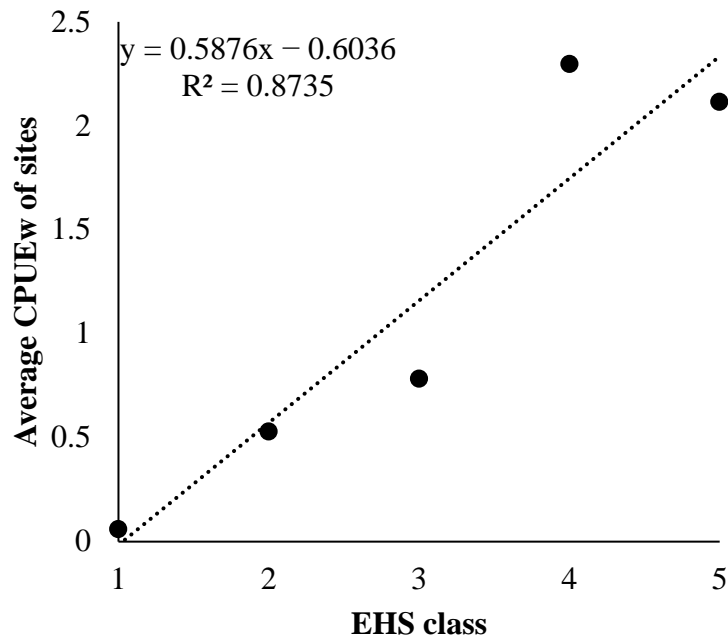

(a)

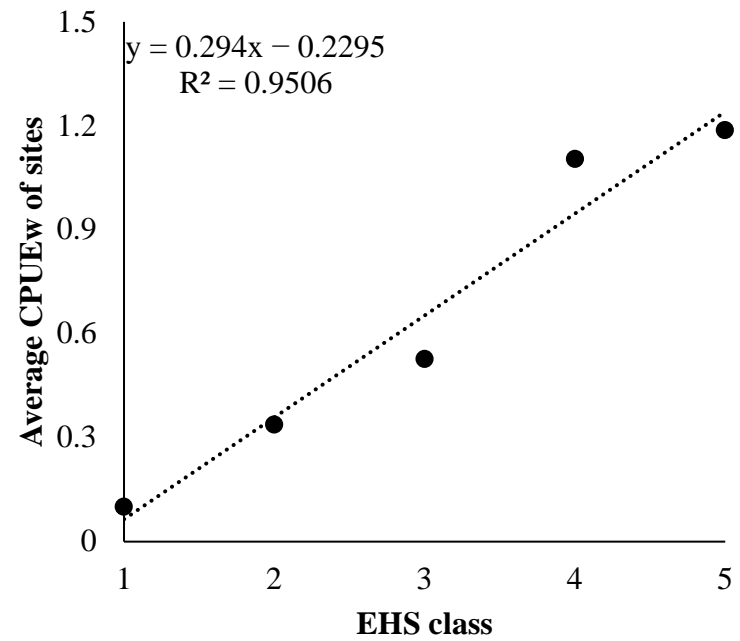

(b)

Figure S1. Relationship between ecological habitat suitability (EHS) class and average catch per unit effort normalized by stream width (CPUE<sub>w</sub>) for (a) *Zacco platypus* and (b) *Nipponocypris koreanus*.

(a)

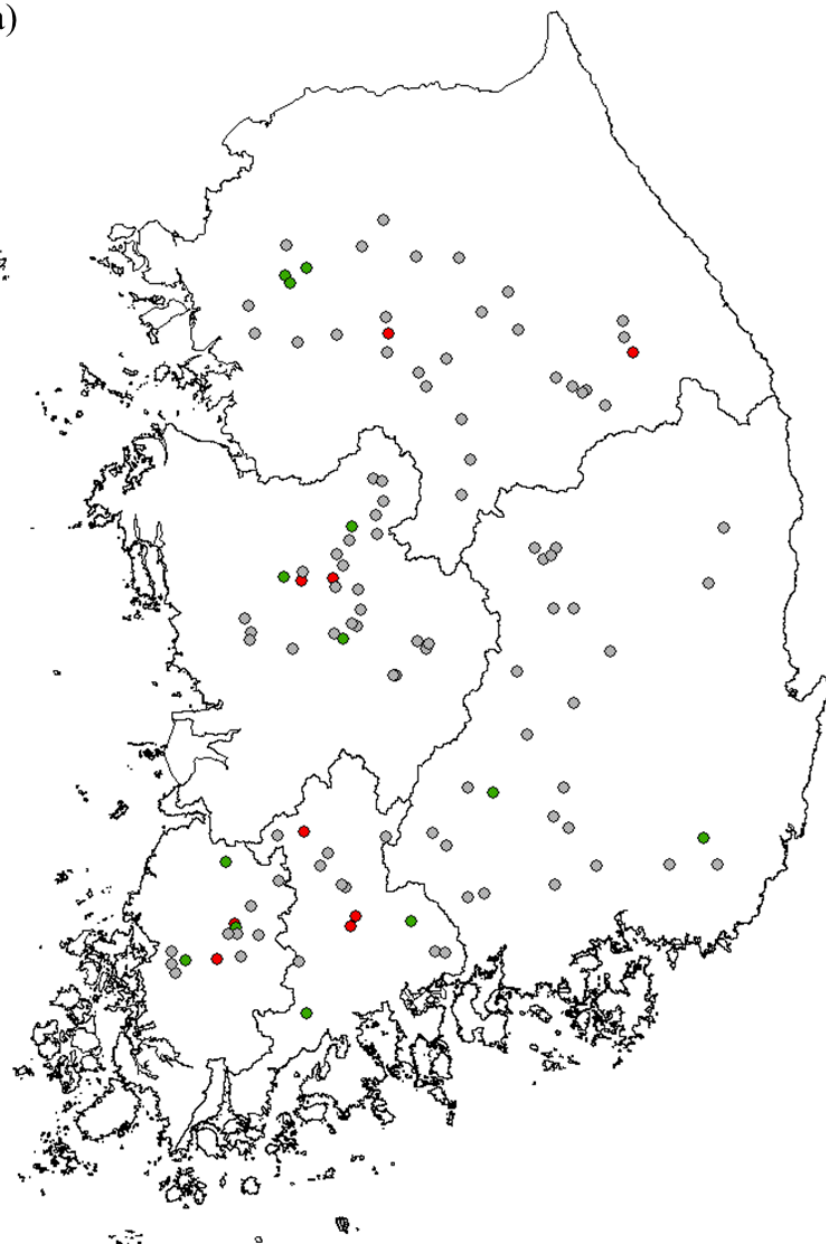

(b)

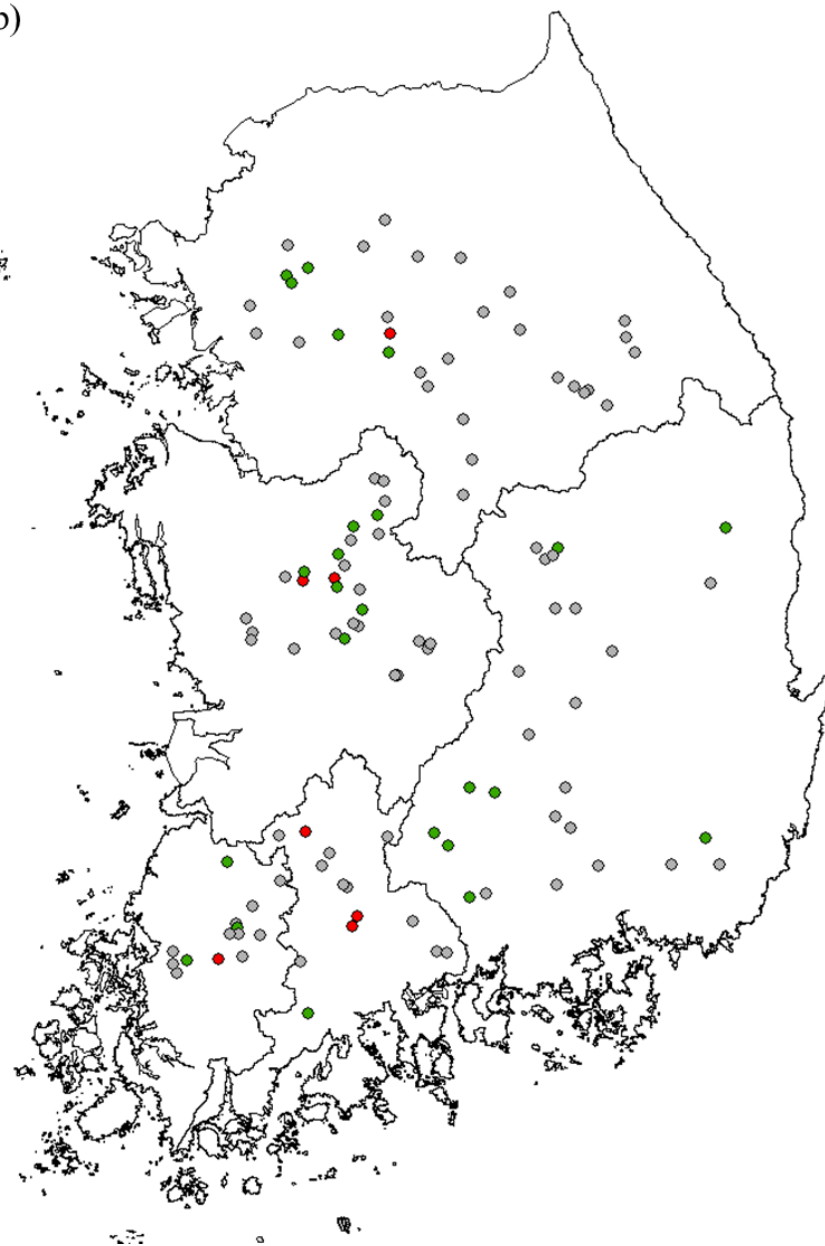

(c)

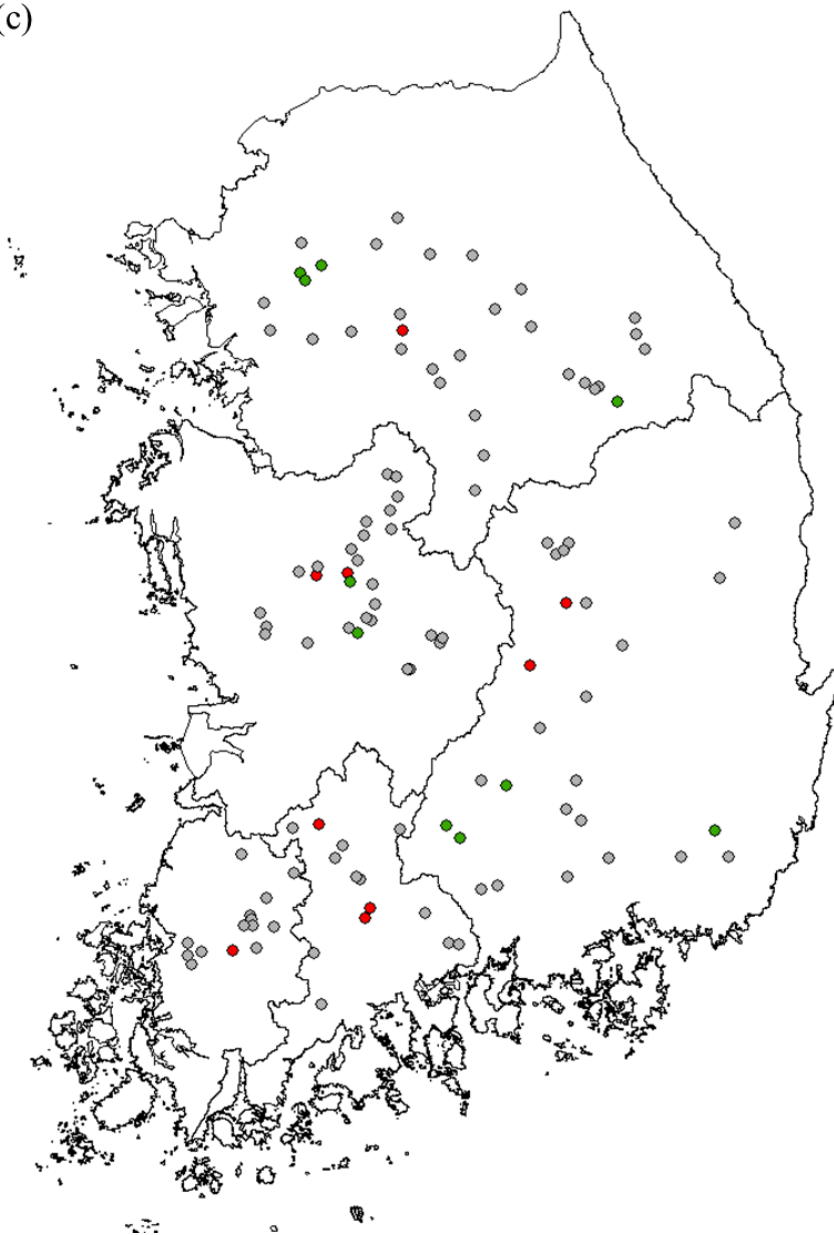

(d)

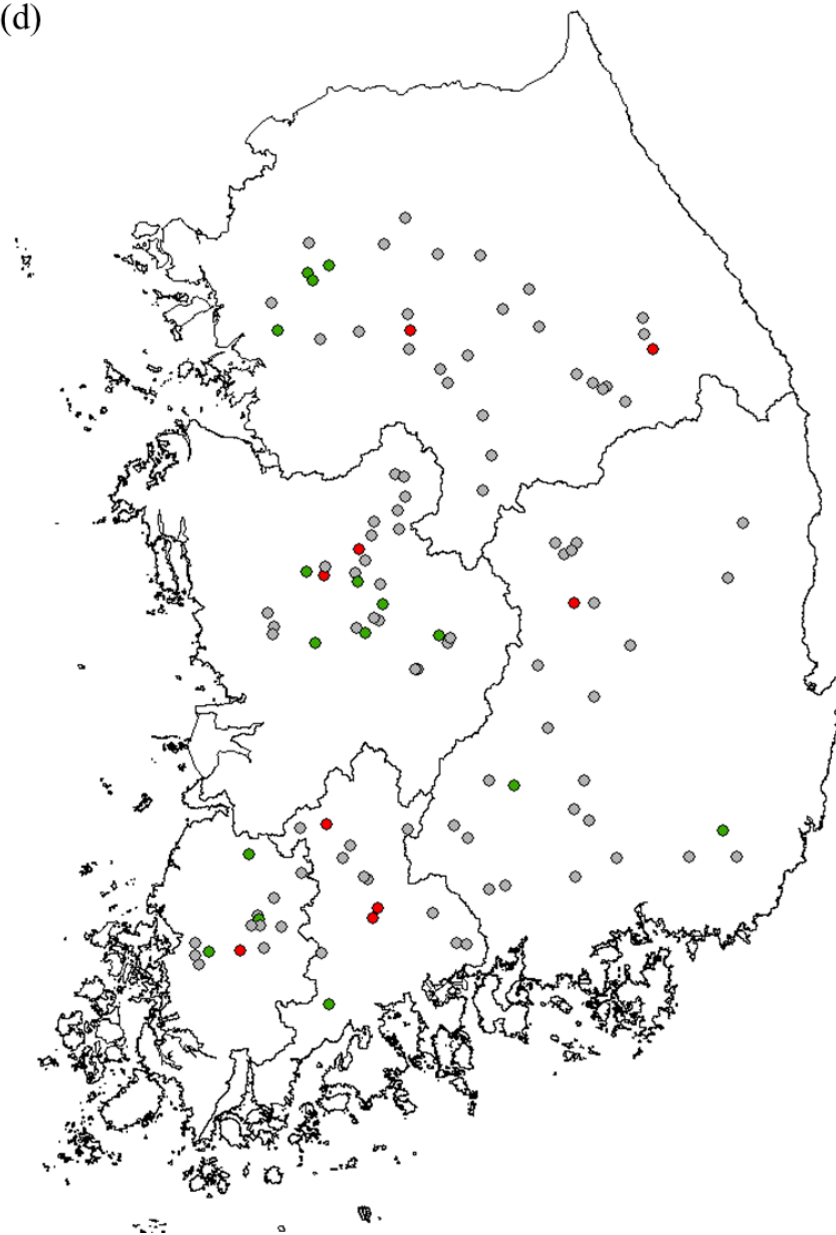

(e)

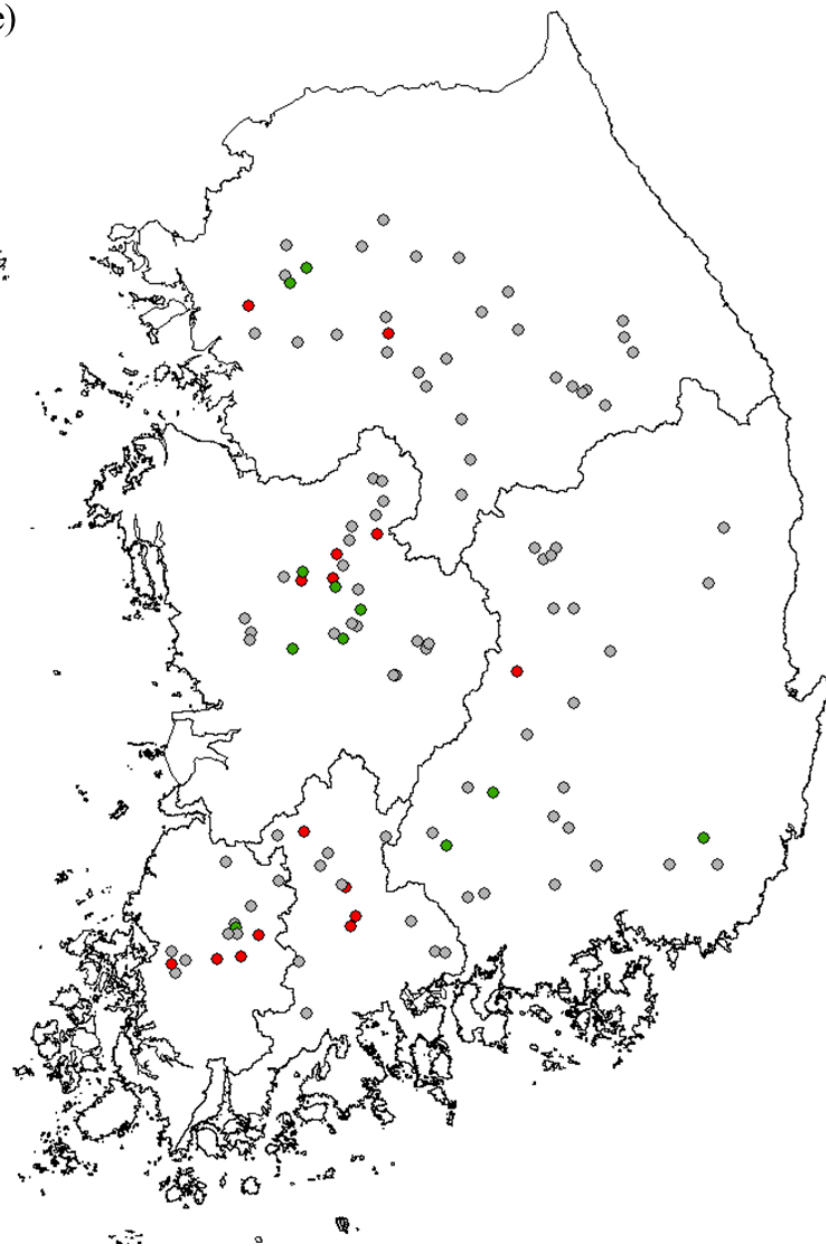

(f)

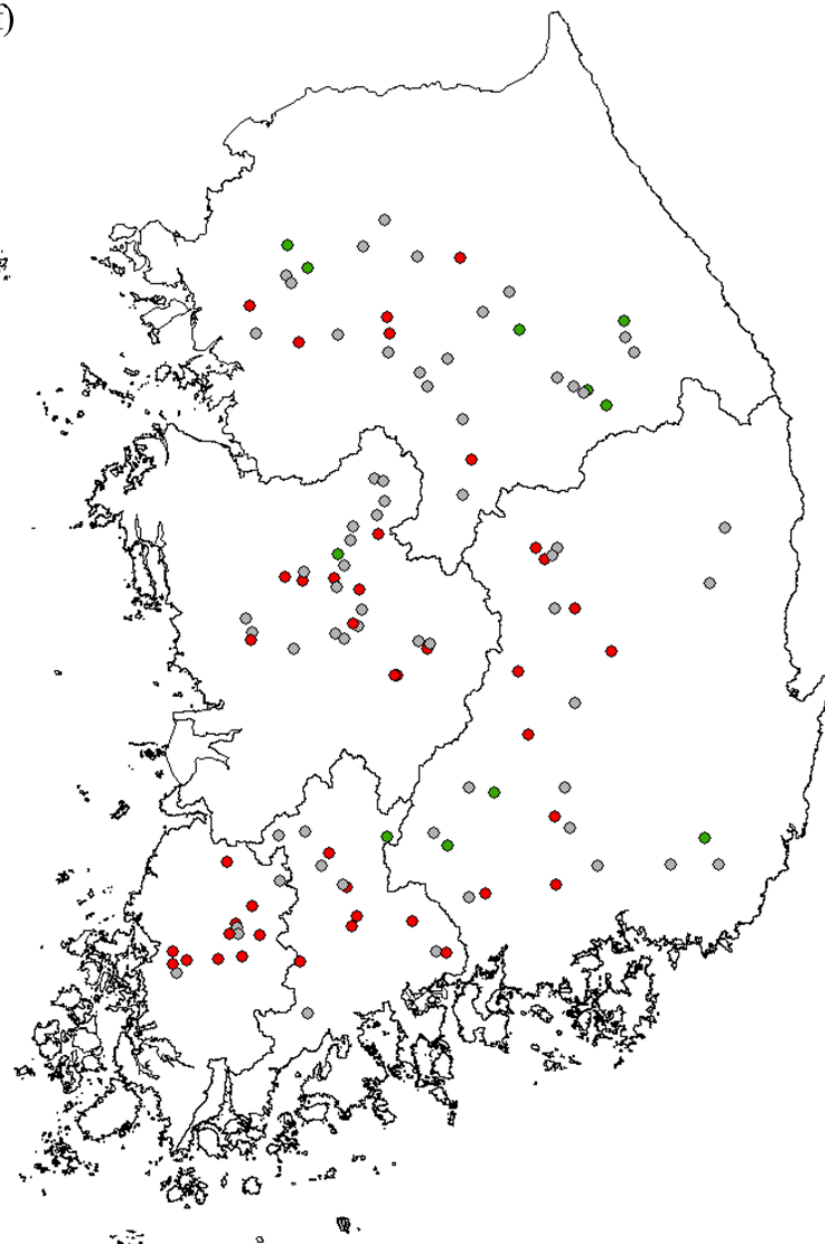

Figure S2. Study sites (total 115) where present habitat suitability (EHS) for *Zacco platypus* was significantly different ( $p < 0.05$ ) from future EHS according to ANOVA under RCP 4.5 scenario at (a) 2030 (2026–2035), (b) 2050 (2046–2055), and (c) 2080 (2076–2085) and RCP 8.5 scenario at (d) 2030, (e) 2050, and (f) 2080 (red: decrease, gray: no difference, and green: increase).

(a)

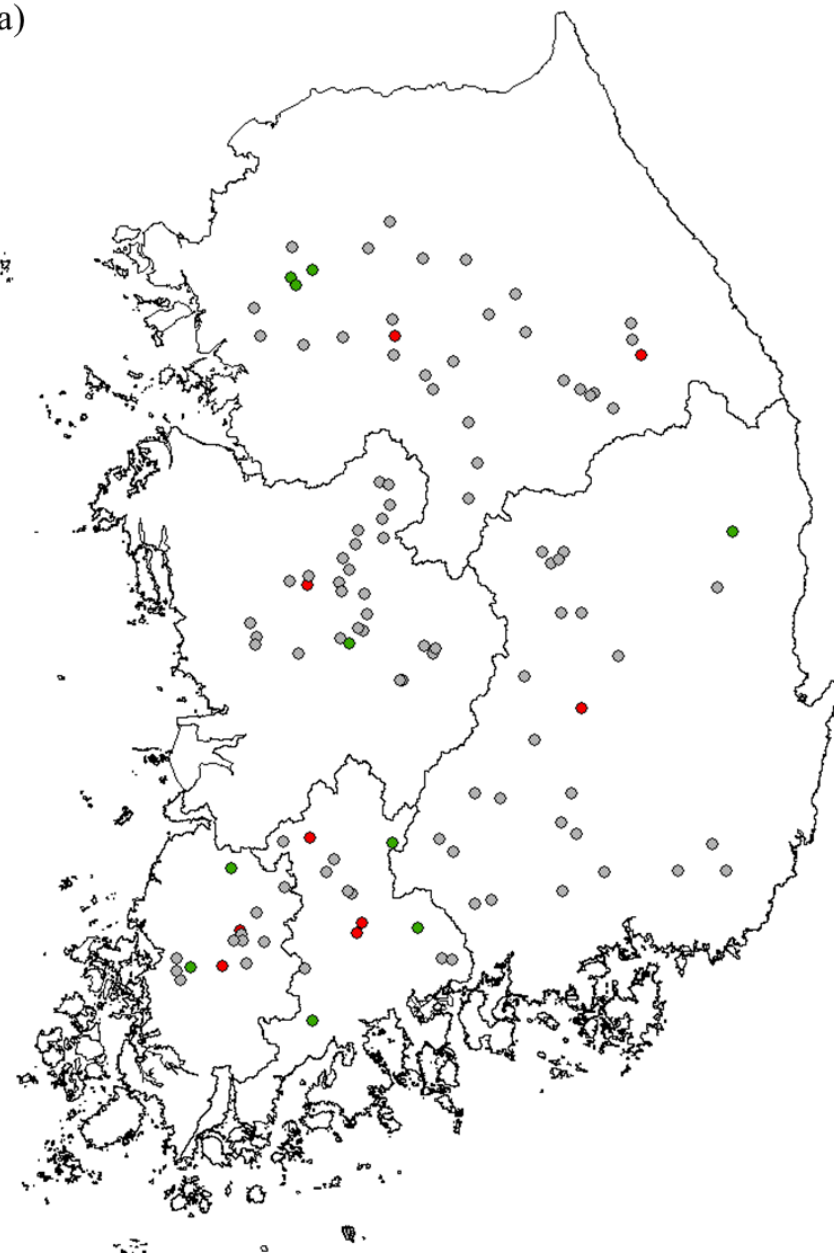

(b)

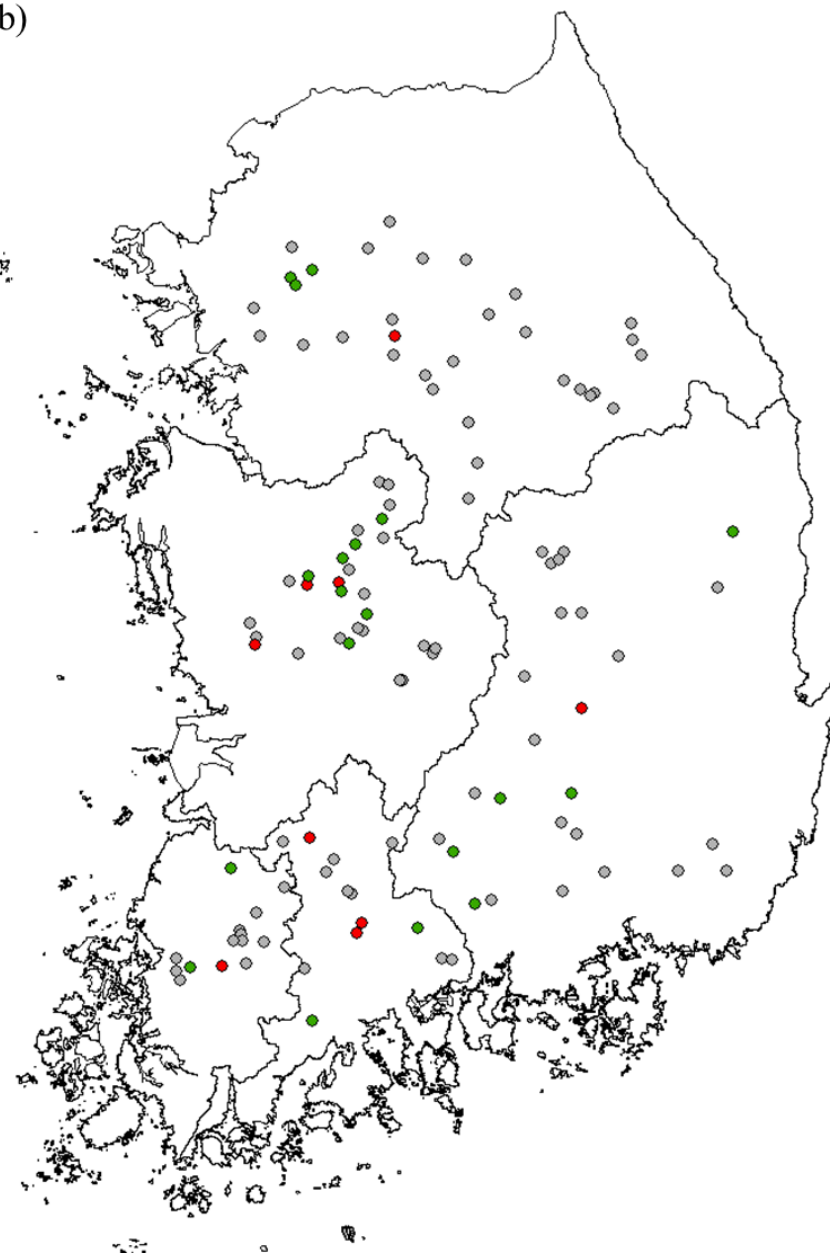

(c)

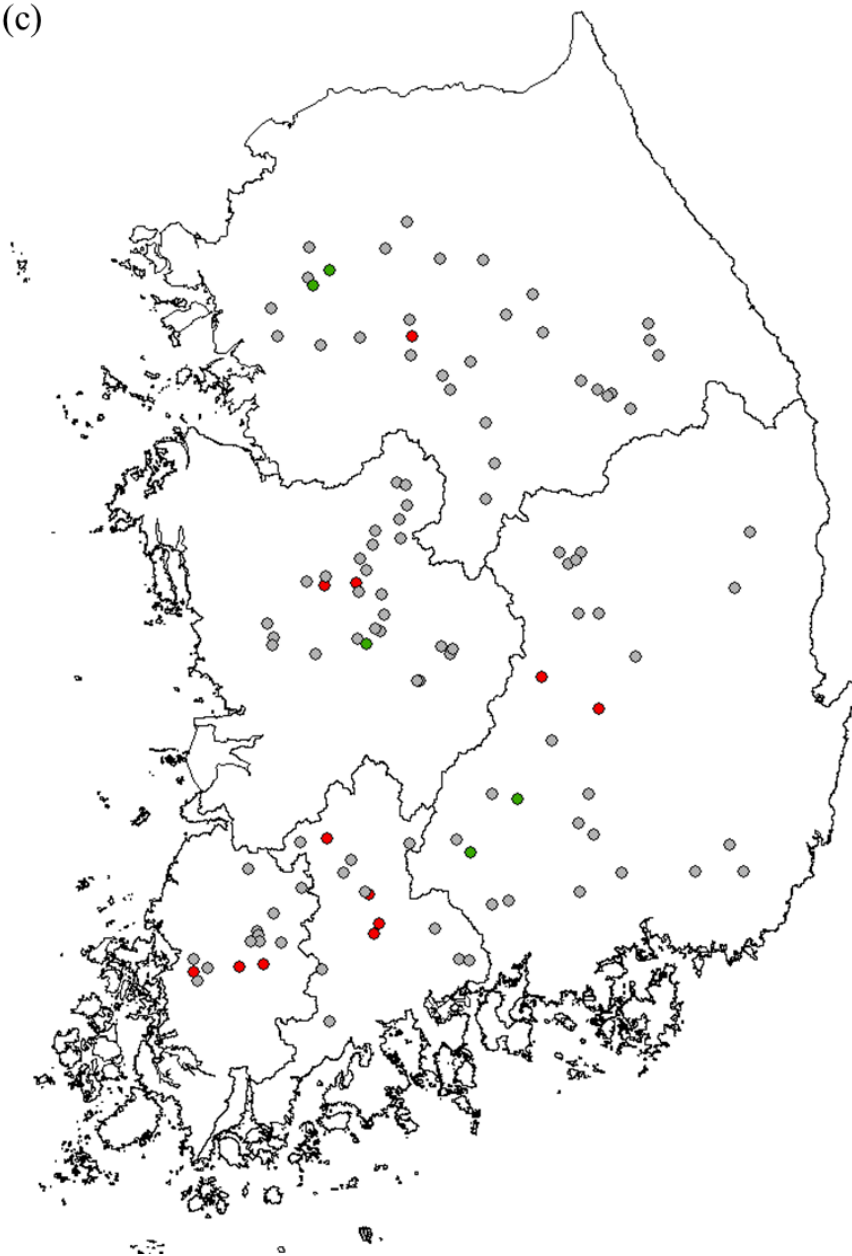

(d)

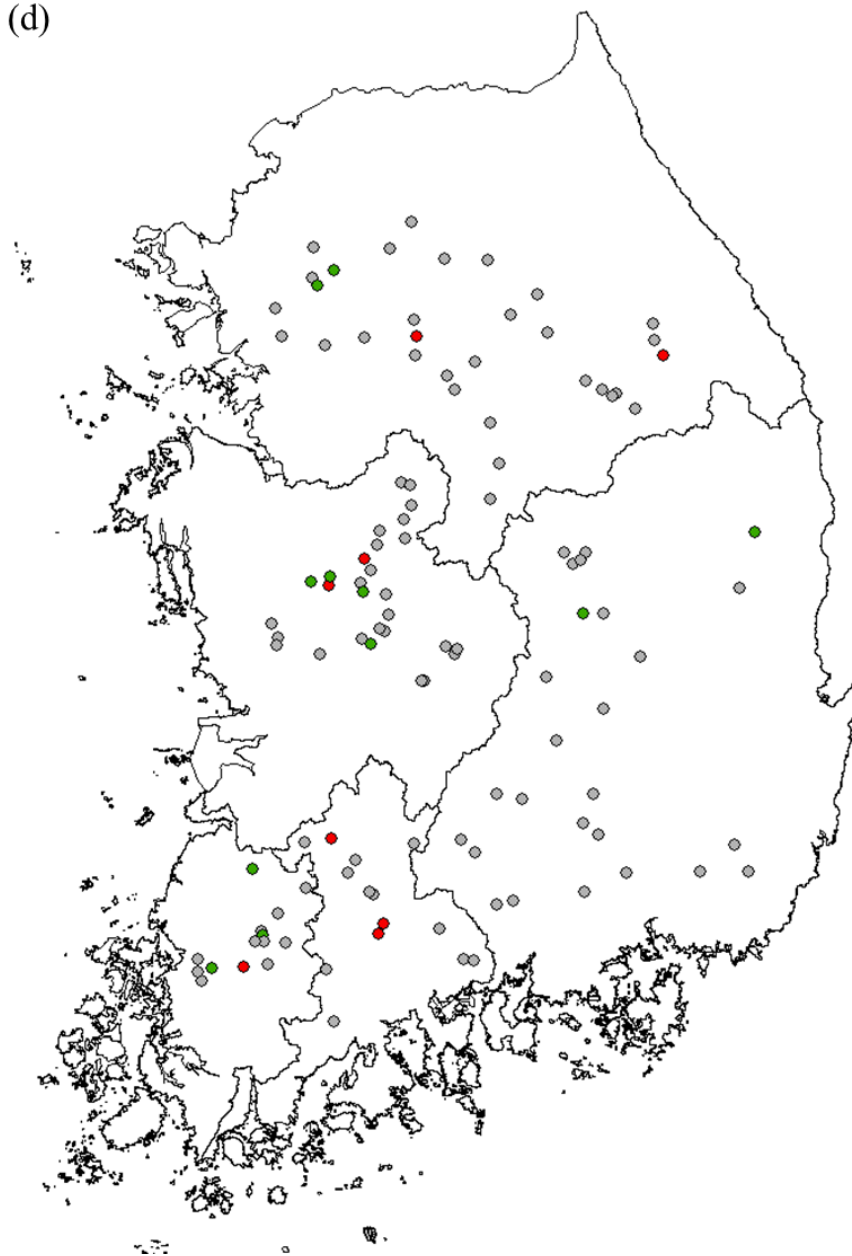



(e)

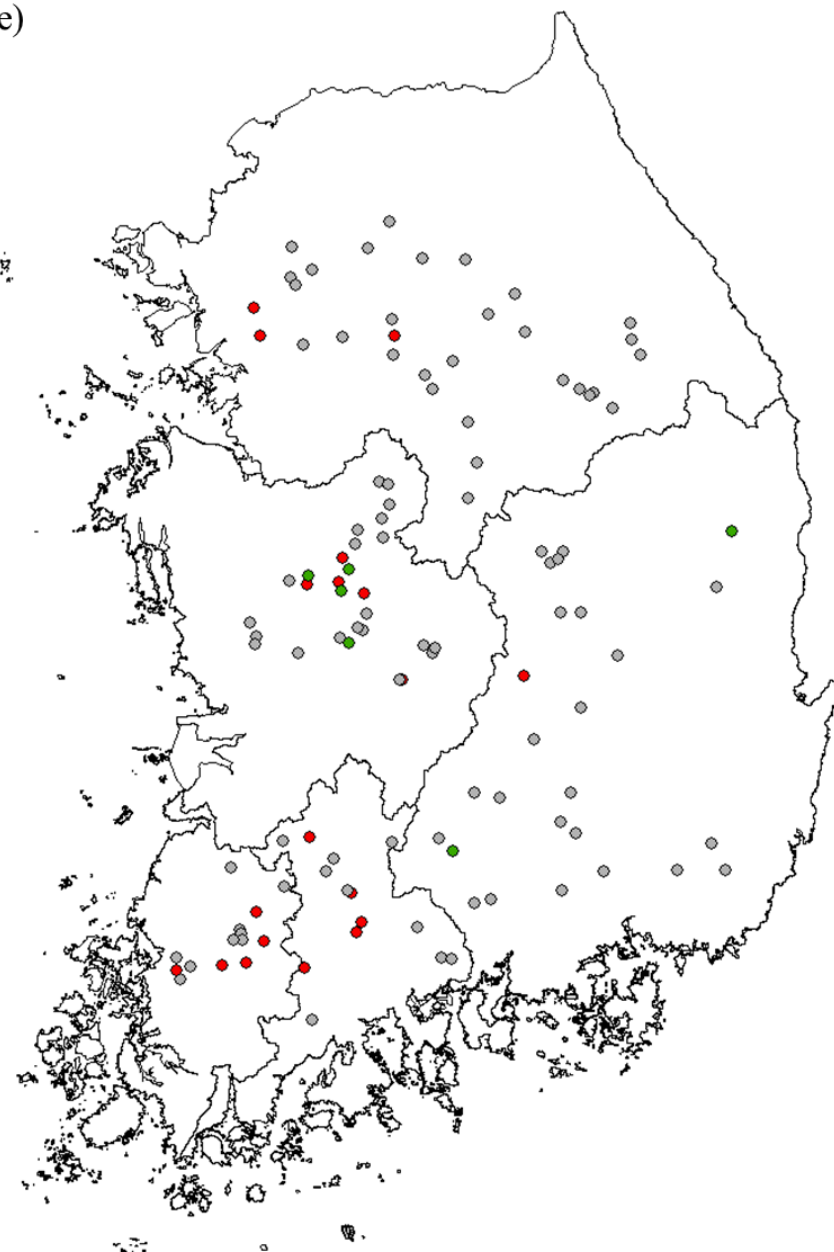

(f)

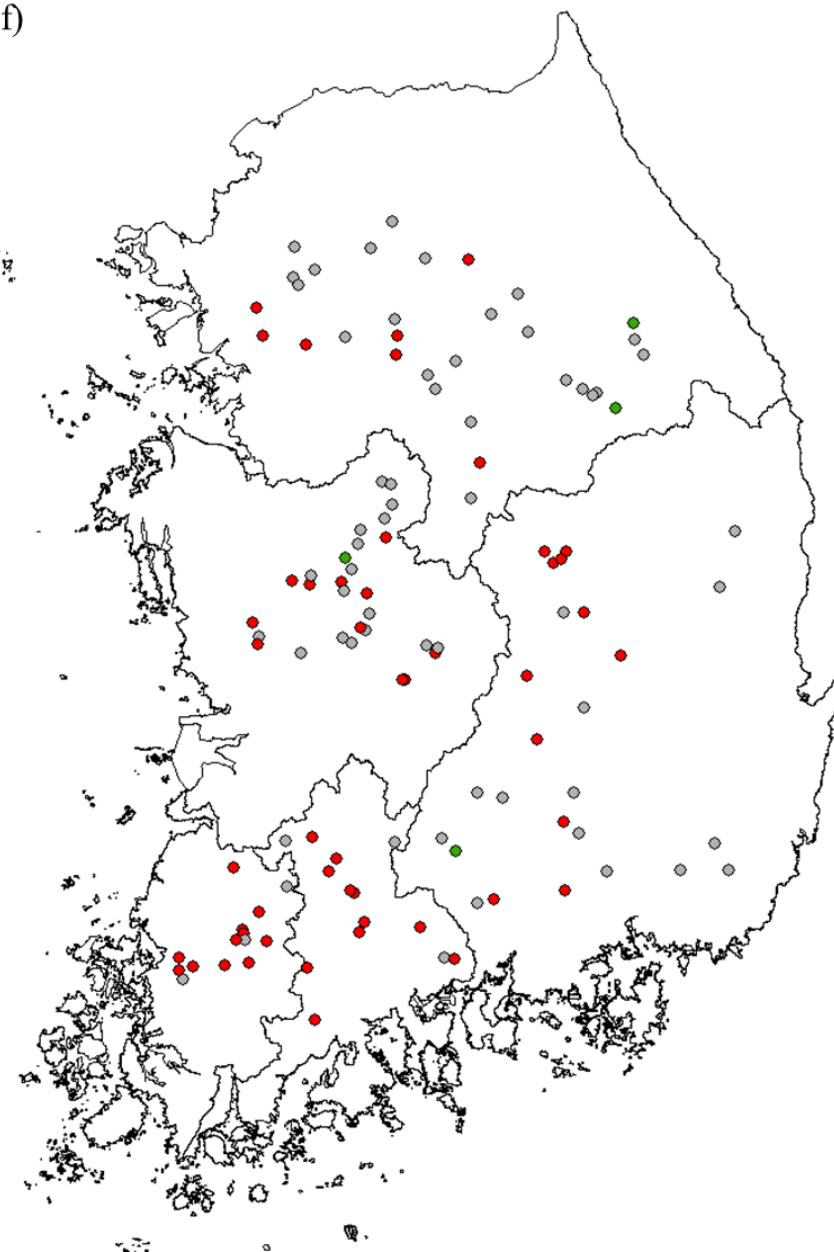



Figure S3. Study sites (total 115) where present habitat suitability (EHS) for *Nipponocypris koreanus* was significantly different ( $p < 0.05$ ) from future EHS according to ANOVA under RCP 4.5 scenario at (a) 2030 (2026–2035), (b) 2050 (2046–2055), and (c) 2080 (2076–2085) and RCP 8.5 scenario at (d) 2030, (e) 2050, and (f) 2080 (red: decrease, gray: no difference, and green: increase).

Table S1. Parameters for growth and stress curves of *Zacco platypus* and *Nipponocypris koreanus*.

| Parameters |    | <i>Z. platypus</i> | <i>N. koreanus</i> |
|------------|----|--------------------|--------------------|
| Growth     | G0 | 13.6 °C            | 12.6 °C            |
|            | G1 | 18.6 °C            | 16.7 °C            |
|            | G2 | 24 °C              | 22.2 °C            |
|            | G3 | 27 °C              | 25.4 °C            |
| Stress     | C0 | 6 °C               | 6 °C               |
|            | CR | 0.0675             | 0.0827             |
|            | H0 | 30 °C              | 29 °C              |
|            | HR | 0.0924             | 0.0959             |

Table S2. Five ecological habitat suitability (EHS) classes for *Zacco platypus* and *Nipponocypris koreanus*.

| Class | <i>Z. platypus</i>       |                 | <i>N. koreanus</i>       |                 |
|-------|--------------------------|-----------------|--------------------------|-----------------|
|       | Range                    | Number of sites | Range                    | Number of sites |
| 1     | $EHS \leq 0.084$         | 15              | $EHS \leq 0.152$         | 4               |
| 2     | $0.084 < EHS \leq 0.261$ | 21              | $0.152 < EHS \leq 0.241$ | 16              |
| 3     | $0.261 < EHS \leq 0.379$ | 34              | $0.241 < EHS \leq 0.315$ | 13              |
| 4     | $0.379 < EHS \leq 0.469$ | 33              | $0.315 < EHS \leq 0.403$ | 17              |
| 5     | $0.469 < EHS$            | 12              | $0.403 < EHS$            | 4               |

Table S3. Average and standard deviation (total 115 sites) of hydraulic (HHS) and physiologic (PHS) suitabilities for *Z. platypus* and *N. koreanus* in South Korea at present (2008–2015), 2030 (2026–2035), 2050 (2046–2055), and 2080 (2076–2085). Numbers in the parenthesis indicate percent (%) change compared to present.

| Index | Scenario | Period  | <i>Z. platypus</i> | <i>N. koreanus</i> |
|-------|----------|---------|--------------------|--------------------|
| HHS   | RCP 4.5  | Present | 0.578              | 0.561              |
|       |          | 2030    | 0.558 (−3.46%)     | 0.537 (−4.28%)     |
|       |          | 2050    | 0.564 (−2.42%)     | 0.544 (−3.03%)     |
|       |          | 2080    | 0.554 (−4.15%)     | 0.535 (−4.63%)     |
|       | RCP 8.5  | Present | 0.582              | 0.566              |
|       |          | 2030    | 0.559 (−3.95%)     | 0.540 (−4.59%)     |
|       |          | 2050    | 0.568 (−2.41%)     | 0.549 (−3.00%)     |
|       |          | 2080    | 0.559 (−3.95%)     | 0.541 (−4.42%)     |
| PHS   | -        | Present | 0.213              | 0.155              |
|       | RCP 4.5  | 2030    | 0.234 (+9.86%)     | 0.167 (+7.74%)     |
|       |          | 2050    | 0.243 (+14.1%)     | 0.176 (+13.6%)     |

|         |      |                |                |
|---------|------|----------------|----------------|
|         | 2080 | 0.232 (+8.92%) | 0.163 (+5.16%) |
|         | 2030 | 0.240 (+12.7%) | 0.172 (+11.0%) |
| RCP 8.5 | 2050 | 0.210 (-1.41%) | 0.143 (-7.74%) |
|         | 2080 | 0.181 (-15.0%) | 0.113 (-27.1%) |

Table S4. Average growth (GI) and stress (SI) indices for *Zacco platypus* and *Nipponocypris koreanus* at 115 sites in South Korea at present (2008–2015), 2030 (2026–2035), 2050 (2046–2055), and 2080 (2076–2085).

|    | Scenario | Period  | <i>Zacco platypus</i> | <i>Nipponocypris koreanus</i> |
|----|----------|---------|-----------------------|-------------------------------|
| GI | -        | Present | 0.329 ± 0.043         | 0.294 ± 0.043                 |
|    | RCP 4.5  | 2030    | 0.387 ± 0.040         | 0.344 ± 0.046                 |
|    |          | 2050    | 0.387 ± 0.043         | 0.346 ± 0.045                 |
|    |          | 2080    | 0.371 ± 0.047         | 0.326 ± 0.047                 |
|    | RCP 8.5  | 2030    | 0.388 ± 0.042         | 0.343 ± 0.047                 |
|    |          | 2050    | 0.366 ± 0.047         | 0.325 ± 0.045                 |
|    |          | 2080    | 0.331 ± 0.055         | 0.294 ± 0.046                 |
| SI | -        | Present | 0.634 ± 0.161         | 0.510 ± 0.191                 |
|    | RCP 4.5  | 2030    | 0.595 ± 0.170         | 0.475 ± 0.197                 |
|    |          | 2050    | 0.620 ± 0.157         | 0.498 ± 0.185                 |
|    |          | 2080    | 0.613 ± 0.154         | 0.484 ± 0.184                 |
|    | RCP 8.5  | 2030    | 0.612 ± 0.161         | 0.493 ± 0.189                 |
|    |          | 2050    | 0.558 ± 0.170         | 0.421 ± 0.196                 |
|    |          | 2080    | 0.524 ± 0.210         | 0.362 ± 0.234                 |

Table S5. Average values (total 115 sites) of environmental variables (Flow<sub>avg</sub> = annual average flow, Flow<sub>min</sub> = annual minimum flow, Flow<sub>max</sub> = annual maximum flow, Depth= annual depth, Velocity= annual velocity, WT<sub>avg</sub> = annual average water temperature, WT<sub>min</sub> = annual minimum water temperature, WT<sub>max</sub> = annual maximum water temperature, Cold = number of cold days, Hot = number of hot days) in South Korea at present (2008–2015), 2030 (2026–2035), 2050 (2046–2055), and 2080 (2076–2085).

| Scenario | Period  | Flow <sub>avg</sub> | Flow <sub>min</sub> | Flow <sub>max</sub> | Depth | Velocity | WT <sub>avg</sub> | WT <sub>min</sub> | WT <sub>max</sub> | Cold | Hot* | Hot** |
|----------|---------|---------------------|---------------------|---------------------|-------|----------|-------------------|-------------------|-------------------|------|------|-------|
| RCP 4.5  | Present | 19.7                | 0.201               | 539                 | 0.465 | 0.187    | 15.4              | 12.1              | 19.2              | 111  | 44.5 | 62.5  |
|          | 2030    | 23.7                | 0.180               | 686                 | 0.871 | 0.194    | 15.7              | 12.3              | 19.7              | 111  | 31.2 | 49.9  |
|          | 2050    | 26.2                | 0.191               | 790                 | 0.896 | 0.210    | 16.2              | 12.9              | 20.1              | 105  | 36.0 | 54.8  |
|          | 2080    | 29.6                | 0.182               | 1124                | 0.898 | 0.212    | 16.6              | 13.4              | 20.5              | 99.8 | 45.8 | 65.7  |
| RCP 8.5  | Present | 19.1                | 0.198               | 522                 | 0.831 | 0.192    | 15.4              | 12.1              | 19.2              | 111  | 44.5 | 62.5  |
|          | 2030    | 26.3                | 0.182               | 803                 | 0.889 | 0.204    | 15.8              | 12.4              | 19.7              | 108  | 31.0 | 50.7  |
|          | 2050    | 23.9                | 0.176               | 645                 | 0.892 | 0.205    | 16.6              | 13.2              | 20.4              | 103  | 50.6 | 71.5  |
|          | 2080    | 26.1                | 0.170               | 624                 | 0.904 | 0.214    | 17.8              | 14.5              | 21.6              | 87.0 | 77.5 | 99.2  |

\* *Zacco platypus*, \*\* *Nipponocypris koreanus*

Table S6. Median and average water temperatures for *Zacco platypus* and *Nipponocypris koreanus* habitats monitored in South Korea from 2008 to 2016.

| Temperature (°C) | <i>Z. platypus</i> | <i>N. koreanus</i> |
|------------------|--------------------|--------------------|
| Range            | 7.4–34.4           | 7.5–33.1           |
| Median           | 21.6               | 19.9               |
| Average          | 21.2               | 19.8               |
